# Supplementary material
Source: ML conference proceedings conference paper supplement (https://proceedings.neurips.cc/paper_files/paper/2015/hash/f3f27a324736617f20abbf2ffd806f6d-Abstract.html)
Supplement: Supplementary file [file f3f27a324736617f20abbf2ffd806f6d-Supplemental.zip]

# Supplementary material

## A Proof of Theorem 1

**Note:** This proof is inspired by one of Bach [1]. We extend their result to the case of a general sketching matrix  $S$ . Moreover, we believe their argument contains two problematic statements (about monotonicity of the bias) that we rectify with Lemma 2 and Lemma 3 below. Their result therefore holds also true with minimal change based on this argument.

For kernel ridge regression, the bias of the estimator  $\hat{f}_K$  can be expressed as

$$\begin{aligned} \text{bias}(K)^2 &= n\lambda^2 \|(K + n\lambda I)^{-1} f^*\|^2 \\ &= n\lambda^2 f^{*\top} (K + n\lambda I)^{-2} f^*. \end{aligned}$$

For  $\gamma > 0$ , we consider again the regularized approximation  $L_\gamma = KS(S^\top KS + n\gamma I)^{-1}S^\top K$  with  $S \in \mathbb{R}^{n \times p}$  the sketching matrix. The result of the theorem follows from the three following lemmas.

**Lemma 1.** *Let  $K = U\Sigma U^\top$  where  $U$  is orthogonal and  $\Sigma$  diagonal positive. We have*

$$L_\gamma \preceq L \preceq K. \quad (1)$$

Moreover, let

$$D = \Phi - \Phi^{1/2}U^\top SS^\top U\Phi^{1/2}$$

with  $\Phi = \Sigma(\Sigma + n\gamma I)^{-1}$ . If  $\lambda_{\max}(D) \leq t$  for  $t \in (0, 1)$  then

$$0 \preceq K - L_\gamma \preceq \frac{n\gamma}{1-t}I.$$

**Lemma 2.** *If  $0 \preceq K - L_\gamma \preceq \frac{n\gamma}{1-t}I$  then  $\text{bias}(L_\gamma) \leq \left(1 + \frac{\gamma/\lambda}{1-t}\right) \text{bias}(K)$ .*

**Lemma 3.** *If  $0 \preceq K - L_\gamma \preceq \frac{n\gamma}{1-t}I$  and  $\lambda \geq \frac{1}{1-t} \|S\|_{op}^2 \cdot \frac{\lambda_{\max}(K)}{n}$  then the map  $\gamma \rightarrow \text{bias}(L_\gamma)$  is increasing. This in particular implies that under the same conditions,  $\text{bias}(L) \leq \text{bias}(L_\gamma)$ .*

We next prove the above lemmas.

*Proof of Lemma 1.* With  $K = U\Sigma U^\top$  and  $R = \Sigma^{1/2}U^\top S$ ,  $\bar{L}_\gamma = R(R^\top R + n\gamma I)^{-1}R^\top$ , we have

$$L_\gamma = U\Sigma^{1/2}\bar{L}_\gamma\Sigma^{1/2}U^\top.$$

Due to the matrix inversion lemma, we have

$$\begin{aligned} \bar{L}_\gamma &= RR^\top (RR^\top + n\gamma I)^{-1} \\ &= I - n\gamma (RR^\top + n\gamma I)^{-1} \\ &= I - n\gamma (\Sigma + n\gamma I + RR^\top - \Sigma)^{-1} \\ &= I - n\gamma (\Sigma + n\gamma I)^{-1/2} (I - D)^{-1} (\Sigma + n\gamma I)^{-1/2} \end{aligned}$$

with

$$\begin{aligned} D &= (\Sigma + n\gamma I)^{-1/2} (\Sigma - RR^\top) (\Sigma + n\gamma I)^{-1/2} \\ &= \Phi - \Phi^{1/2}U^\top SS^\top U\Phi^{1/2}, \end{aligned}$$

and  $\Phi = \Sigma(\Sigma + n\gamma I)^{-1}$ . This shows that for any  $\gamma \geq 0$

$$L_\gamma \preceq L \preceq K.$$

Now if  $\lambda_{\max}(D) \leq t$  for  $t \in (0, 1)$ ,

$$I - \bar{L}_\gamma \preceq \frac{n\gamma}{1-t} (\Sigma + n\gamma I)^{-1}$$

which implies

$$0 \preceq K - L_\gamma \preceq \frac{n\gamma}{1-t} K(K + n\gamma I)^{-1} \preceq \frac{n\gamma}{1-t} I.$$

□

*Proof of Lemma 2.* This proof was communicated to us by Francis Bach [2].

Since  $K - L_\gamma$  commutes with the identity, we have

$$(K - L_\gamma)^2 \preceq \frac{n^2\gamma^2}{(1-t)^2} I.$$

Now,

$$\begin{aligned} \|(L_\gamma + n\lambda I)^{-1} f^* - (K + n\lambda I)^{-1} f^*\|_2 &= \|(L_\gamma + n\lambda I)^{-1} (K - L_\gamma) (K + n\lambda I)^{-1} f^*\|_2 \\ &\leq \|(L_\gamma + n\lambda I)^{-1} (K - L_\gamma)\|_{\text{op}} \cdot \|(K + n\lambda I)^{-1} f^*\|_2. \end{aligned}$$

On the other hand,

$$\begin{aligned} \|(L_\gamma + n\lambda I)^{-1} (K - L_\gamma)\|_{\text{op}}^2 &= \|(L_\gamma + n\lambda I)^{-1} (K - L_\gamma)^2 (L_\gamma + n\lambda I)^{-1}\|_{\text{op}} \\ &\leq \frac{n^2\gamma^2}{(1-t)^2} \|(L_\gamma + n\lambda I)^{-2}\|_{\text{op}} \\ &\leq \frac{n^2\gamma^2}{(1-t)^2} \|(L_\gamma + n\lambda I)^{-1}\|_{\text{op}}^2. \end{aligned}$$

This yields,

$$\begin{aligned} \|(L_\gamma + n\lambda I)^{-1} f^*\|_2 &\leq \|(K + n\lambda I)^{-1} f^*\|_2 + \|(L_\gamma + n\lambda I)^{-1} f^* - (K + n\lambda I)^{-1} f^*\|_2 \\ &\leq \|(K + n\lambda I)^{-1} f^*\|_2 \cdot \left(1 + \frac{n\gamma}{1-t} \|(L_\gamma + n\lambda I)^{-1}\|_{\text{op}}\right) \\ &\leq \|(K + n\lambda I)^{-1} f^*\|_2 \cdot \left(1 + \frac{\gamma/\lambda}{1-t}\right). \end{aligned}$$

Hence we have the bias inequality

$$\text{bias}(L_\gamma) \leq \left(1 + \frac{\gamma/\lambda}{1-t}\right) \text{bias}(K).$$

□

*Proof of Lemma 3.* Let  $\varphi(\gamma) = f^{*\top} (L_\gamma + n\lambda I)^{-2} f^*$ . The task is to prove that  $\varphi$  is increasing if  $\lambda \geq \frac{1}{1-t} \|S\|_{\text{op}}^2 \frac{\lambda_{\max}(K)}{n}$ . We do so by computing the derivative of  $\varphi$  and showing that  $\varphi' \geq 0$ . Let  $\gamma, \gamma' > 0$ . We have

$$\begin{aligned} \varphi(\gamma) - \varphi(\gamma') &= f^{*\top} ((L_\gamma + n\lambda I)^{-2} - (L_{\gamma'} + n\lambda I)^{-2}) f^* \\ &= f^{*\top} (L_\gamma + n\lambda I)^{-2} ((L_{\gamma'} + n\lambda I)^2 - (L_\gamma + n\lambda I)^2) (L_{\gamma'} + n\lambda I)^{-2} f^* \\ &= f^{*\top} (L_\gamma + n\lambda I)^{-2} ((L_{\gamma'}^2 - L_\gamma^2) + 2n\lambda(L_{\gamma'} - L_\gamma)) (L_{\gamma'} + n\lambda I)^{-2} f^*. \end{aligned}$$

Now we compute the terms  $L_{\gamma'} - L_\gamma$  and  $L_{\gamma'}^2 - L_\gamma^2$ :

$$\begin{aligned} L_{\gamma'} - L_\gamma &= KS(S^\top KS + n\gamma' I)^{-1} S^\top K - KS(S^\top KS + n\gamma I)^{-1} S^\top K \\ &= KS(S^\top KS + n\gamma' I)^{-1} (n(\gamma - \gamma')) (S^\top KS + n\gamma I)^{-1} S^\top K. \end{aligned}$$

And

$$\begin{aligned}
L_{\gamma'}^2 - L_{\gamma}^2 &= KS(S^{\top}KS + n\gamma'I)^{-1}S^{\top}K^2S(S^{\top}KS + n\gamma'I)^{-1}S^{\top}K \\
&\quad - KS(S^{\top}KS + n\gamma I)^{-1}S^{\top}K^2S(S^{\top}KS + n\gamma I)^{-1}S^{\top}K \\
&= KS(S^{\top}KS + n\gamma'I)^{-1}S^{\top}K^2S(S^{\top}KS + n\gamma'I)^{-1}S^{\top}K \\
&\quad - KS(S^{\top}KS + n\gamma'I)^{-1}S^{\top}K^2S(S^{\top}KS + n\gamma I)^{-1}S^{\top}K \\
&\quad + KS(S^{\top}KS + n\gamma'I)^{-1}S^{\top}K^2S(S^{\top}KS + n\gamma I)^{-1}S^{\top}K \\
&\quad - KS(S^{\top}KS + n\gamma I)^{-1}S^{\top}K^2S(S^{\top}KS + n\gamma I)^{-1}S^{\top}K \\
&= KS(S^{\top}KS + n\gamma'I)^{-1}S^{\top}K^2S[(S^{\top}KS + n\gamma'I)^{-1} - (S^{\top}KS + n\gamma I)^{-1}]S^{\top}K \\
&\quad + KS[(S^{\top}KS + n\gamma'I)^{-1} - (S^{\top}KS + n\gamma I)^{-1}]S^{\top}K^2S(S^{\top}KS + n\gamma'I)^{-1}S^{\top}K.
\end{aligned}$$

The first term is the last equality above is equal to

$$n(\gamma - \gamma') \cdot KS(S^{\top}KS + n\gamma'I)^{-1}S^{\top}K^2S(S^{\top}KS + n\gamma'I)^{-1}(S^{\top}KS + n\gamma I)^{-1}S^{\top}K,$$

and the second one is equal to

$$n(\gamma - \gamma') \cdot KS(S^{\top}KS + n\gamma'I)^{-1}(S^{\top}KS + n\gamma I)^{-1}S^{\top}K^2S(S^{\top}KS + n\gamma'I)^{-1}S^{\top}K.$$

Now combining the above and taking the limit  $\gamma' \rightarrow \gamma$  we have

$$\begin{aligned}
\lim_{\gamma' \rightarrow \gamma} \frac{\varphi(\gamma) - \varphi(\gamma')}{n(\gamma - \gamma')} &= \\
&f^{*\top}(L_{\gamma} + n\lambda I)^{-2}KS(S^{\top}KS + n\gamma I)^{-1} \cdot Q \cdot (S^{\top}KS + n\gamma I)^{-1}S^{\top}K(L_{\gamma} + n\lambda I)^{-2}f^*,
\end{aligned}$$

with

$$Q = 2n\lambda I + S^{\top}K^2S(S^{\top}KS + n\gamma I)^{-1} + (S^{\top}KS + n\gamma I)^{-1}S^{\top}K^2S := 2n\lambda I + \bar{Q}.$$

Therefore, the function  $\varphi$  is increasing for all  $\gamma$  such that  $Q \succeq 0$ , and the latter is true if  $2n\lambda \geq -\lambda_{\min}(\bar{Q})$ . Moreover, since  $\bar{Q}$  is symmetric we have

$$\lambda_{\min}(\bar{Q}) \geq -\|\bar{Q}\|_{\text{op}} \geq -2\|S^{\top}K^2S(S^{\top}KS + n\gamma I)^{-1}\|_{\text{op}},$$

and it is sufficient to verify the condition

$$n\lambda \geq \|S^{\top}K^2S(S^{\top}KS + n\gamma I)^{-1}\|_{\text{op}}. \quad (2)$$

Now we finish the proof by showing that the above operator norm is smaller than  $\frac{1}{1-t}\|S\|_{\text{op}}^2\lambda_{\max}(K)$ . We have

$$\begin{aligned}
n\gamma S^{\top}K^2S(S^{\top}KS + n\gamma I)^{-1} &= S^{\top}K^2S(S^{\top}KS + n\gamma I)^{-1}(n\gamma I + S^{\top}KS - S^{\top}KS) \\
&= S^{\top}K^2S - S^{\top}K^2S(S^{\top}KS + n\gamma I)^{-1}S^{\top}KS \\
&= S^{\top}K(K - KS(S^{\top}KS + n\gamma I)^{-1}S^{\top}K)S \\
&= S^{\top}K(K - L_{\gamma})S.
\end{aligned}$$

Taking operator norms, and using the assumption  $0 \preceq K - L_{\gamma} \preceq \frac{n\gamma}{1-t}I$ ,

$$n\gamma\|S^{\top}K^2S(S^{\top}KS + n\gamma I)^{-1}\|_{\text{op}} \leq \|S^{\top}\|_{\text{op}}\|K\|_{\text{op}}\frac{n\gamma}{1-t}\|S\|_{\text{op}}.$$

Hence, (2) is satisfied if  $n\lambda \geq \frac{1}{1-t}\|S\|_{\text{op}}^2\lambda_{\max}(K)$  therefore concluding the proof.  $\square$

## B Proof of theorem 2

The proof uses the matrix Bernstein inequality (see e.g. Theorem 6.1.1 in [3]):

**Theorem 1.** Consider a sequence  $(X_k)$  of independent random symmetric matrices with dimension  $d$ . Assume that  $\mathbb{E}(X_k) = 0$ ,  $\lambda_{\max}(X_k) \leq R$ , and let  $Y = \sum_k X_k$ . Furthermore, assume that there exists  $\sigma > 0$  such that  $\|\mathbb{E}(Y^2)\|_{\text{op}} \leq \sigma^2$ . Then

$$\Pr(\lambda_{\max}(Y) \geq t) \leq d \exp\left(\frac{-t^2/2}{\sigma^2 + Rt/3}\right).$$

Next, we exhibit the sequence  $(X_k)$  and  $Y$  in our case. We have

$$\Psi\Psi^\top = \sum_{i=1}^m \psi_i \psi_i^\top$$

and

$$\Psi S S^\top \Psi^\top = \frac{1}{p} \sum_{i \in I} \frac{1}{p_i} \psi_i \psi_i^\top = \frac{1}{p} \sum_{i=1}^m \sum_{k=1}^p \frac{1}{p_i} z_{ik} \psi_i \psi_i^\top$$

where  $(z_{ik})_{1 \leq i \leq m}$  are i.i.d. binary random vectors for  $k \in \{1, \dots, p\}$  with  $\Pr(z_{ik} = 1) = p_i$  (i.e.  $(z_{ik})_{1 \leq i \leq m}$  is the indicator of the chosen column at trial  $k$ ). Let  $Y = \Psi\Psi^\top - \Psi S S^\top \Psi^\top$ , then

$$Y = \frac{1}{p} \sum_{k=1}^p \sum_{i=1}^m \left(1 - \frac{z_{ik}}{p_i}\right) \psi_i \psi_i^\top.$$

We choose  $X_k$  to be  $\frac{1}{p} \sum_{i=1}^m \left(1 - \frac{z_{ik}}{p_i}\right) \psi_i \psi_i^\top$  for every  $k \in \{1, \dots, p\}$ . Now we verify the assumptions of the above theorem. The matrices  $X_k$  inherit independence from the random vectors  $(z_{ik})_{1 \leq i \leq m}$ , and we have  $\mathbb{E}(X_k) = 0$ , and  $\lambda_{\max}(X_k) \leq \frac{1}{p} \lambda_{\max}(\sum_{i=1}^m \psi_i \psi_i^\top) = \frac{1}{p} \lambda_{\max}(\Psi\Psi^\top)$ . Now we control the spectral norm of the second moment of  $Y$ . Again with  $\mathbb{E}(X_k) = 0$  we have  $\mathbb{E}(Y^2) = \sum_{k,k'=1}^p \mathbb{E}(X_k X_{k'}) = \sum_{k=1}^p \mathbb{E}(X_k^2)$ . And for  $k \in \{1, \dots, p\}$

$$\begin{aligned} \mathbb{E}(X_k^2) &= \frac{1}{p^2} \sum_{i,i'=1}^m \mathbb{E}\left(\left(1 - \frac{z_{ik}}{p_i}\right)\left(1 - \frac{z_{i'k}}{p_{i'}}\right)\right) \psi_{i'} \psi_{i'}^\top \psi_i \psi_i^\top \\ &= \frac{1}{p^2} \sum_{i,i'=1}^m \left(\frac{\mathbb{E}(z_{ik} z_{i'k})}{p_i p_{i'}} - 1\right) \psi_{i'} \psi_{i'}^\top \psi_i \psi_i^\top. \end{aligned}$$

To proceed, observe that for  $i \neq i'$ ,  $z_{ik} z_{i'k} = 0$  since only one column is chosen at a time. This yields

$$\begin{aligned} \mathbb{E}(X_k^2) &= \frac{1}{p^2} \sum_{i=1}^m \frac{\mathbb{E}(z_{ik}^2)}{p_i^2} \psi_i \psi_i^\top \psi_i \psi_i^\top - \frac{1}{p^2} \sum_{i,i'=1}^m \psi_{i'} \psi_{i'}^\top \psi_i \psi_i^\top \\ &= \frac{1}{p^2} \sum_{i=1}^m \frac{1}{p_i} \|\psi_i\|_2^2 \psi_i \psi_i^\top - \left(\frac{1}{p} \sum_{i=1}^m \psi_i \psi_i^\top\right)^2 \\ &\preceq \frac{1}{p^2} \sum_{i=1}^m \frac{\|\psi_i\|_2^2}{p_i} \psi_i \psi_i^\top. \end{aligned}$$

Given that the probability distribution  $(p_i)$  verifies  $p_i \geq \beta \frac{\|\psi_i\|_2^2}{\|\Psi\|_F^2}$ , we get  $\mathbb{E}(Y^2) \preceq \frac{\|\Psi\|_F^2}{\beta p} \sum_{i=1}^m \psi_i \psi_i^\top = \frac{\|\Psi\|_F^2}{\beta p} \Psi\Psi^\top$ . Hence  $\|\mathbb{E}(Y^2)\|_{\text{op}} \leq \frac{\|\Psi\|_F^2}{\beta p} \lambda_{\max}(\Psi\Psi^\top)$ . We now apply the theorem with  $R = \frac{1}{p} \lambda_{\max}(\Psi\Psi^\top)$  and  $\sigma^2 = \frac{\|\Psi\|_F^2}{\beta p} \lambda_{\max}(\Psi\Psi^\top)$  which leads to the desired result.

### C Proof of theorem 3

**Monotonicity of the variance.** First of all, we observe that the variance of the estimator  $\hat{f}_K$  is matrix-increasing as a function of  $K$ . Indeed, we have

$$\text{variance}(K) = \frac{\sigma^2}{n} \text{Tr}(K^2(K + n\lambda I)^{-2}) = \frac{\sigma^2}{n} \sum_{j=1}^n \frac{\lambda_j(K)^2}{(\lambda_j(K) + n\lambda)^2},$$

where  $\lambda_j(K)$  is the  $j$ th eigenvalue of  $K$  arranged in a decreasing order. The function  $x \rightarrow \frac{x^2}{(x+n\lambda)^2}$  is increasing for  $x \geq 0$ . Moreover, if  $L \preceq K$  then by the Courant-Fischer minimax principle  $\lambda_j(L) \leq \lambda_j(K)$  for all  $j$  (e.g. see Corollary III.1.2 in [4]).

**Risk bound.** Now, using Theorem 1 combined with the above fact, we have

$$\begin{aligned} \mathbb{E}_\xi \|\hat{f}_L - f^*\|_2^2 &= \text{bias}(L)^2 + \text{variance}(L) \\ &\leq \left(1 + \frac{\gamma/\lambda}{1-t}\right)^2 \text{bias}(K)^2 + \text{variance}(K) \\ &\leq \left(1 + \frac{\gamma/\lambda}{1-t}\right)^2 (\text{bias}(K)^2 + \text{variance}(K)) \\ &= \left(1 + \frac{\gamma/\lambda}{1-t}\right)^2 \mathbb{E}_\xi \|\hat{f}_L - f^*\|_2^2 \end{aligned}$$

We set  $\gamma = \lambda\epsilon$  and  $t = 1/2$ . The above holds if  $\lambda_{\max}(\Phi - \Phi^{1/2}U^\top SS^\top U\Phi^{1/2}) \leq t$  and  $n\lambda \geq \frac{1}{1-t} \|S\|_{\text{op}}^2 \lambda_{\max}(K)$ . Now let  $\Psi = \Phi^{1/2}U^\top$ . Then we have  $\|\psi_i\|_2^2 = l_i(\gamma)$  and  $\|\Psi\|_F^2 = d_{\text{eff}}$ . Using Theorem 2 on  $\Psi$ , and given that  $\lambda_{\max}(\Psi\Psi^\top) = \lambda_{\max}(\Phi) \leq 1$ , for the result to hold with probability at least  $1 - \rho$ , it is sufficient to set  $p$  such that  $n \exp\left(\frac{-p(1/2)^2/2}{d_{\text{eff}}/\beta + 1/6}\right) \leq \rho$  which gives the desired lower bound  $p \geq 8(d_{\text{eff}}/\beta + 1/6) \log\left(\frac{n}{\rho}\right)$ .

**Remark:** Note that if one uses the regularized Nyström approximation  $L_\gamma = KS(S^\top KS + n\gamma I)^{-1}S^\top K$  with  $\gamma = \lambda\epsilon$  instead of  $L = KS(S^\top KS)^\dagger S^\top K$  in the algorithm then the proof would now be complete and the condition  $n\lambda \geq \frac{1}{1-t} \|S\|_{\text{op}}^2 \lambda_{\max}(K)$  is not necessary. If one uses  $L$ , then this latter condition needs to be verified to insure monotonicity of the bias (see Lemma 3).

**Controlling  $\|S\|_{\text{op}}$ .** Now it remains to control the operator norm of the sketching matrix  $S$  appearing in the lower bound on  $\lambda$ . To this end we use a variant of the matrix Bernstein inequality (Theorem 1) for controlling operator norms of random matrices (see Corollary 6.2.1 in [3]).

**Theorem 2.** Consider a sequence  $(X_k)$  of independent random symmetric matrices with dimension  $d \times d$ . Assume that  $\mathbb{E}(X_k) = 0$ ,  $\|X_k\|_{\text{op}} \leq R$ , and let  $Y = \sum_k X_k$ . Furthermore, assume that there exists  $\sigma > 0$  such that  $\|\mathbb{E}(Y^2)\|_{\text{op}} \leq \sigma^2$ . Then

$$\Pr(\|Y\|_{\text{op}} \geq t) \leq 2d \exp\left(\frac{-t^2/2}{\sigma^2 + Rt/3}\right).$$

We are interested in the sum

$$Y = SS^\top - I = \frac{1}{p} \sum_{k=1}^p \sum_{i=1}^n \left(\frac{z_{ik}}{p_i} - 1\right) e_i e_i^\top,$$

and similarly to the previous section we consider the sequence  $X_k = \frac{1}{p} \sum_{i=1}^n \left(\frac{z_{ik}}{p_i} - 1\right) e_i e_i^\top$  where  $z_{ik}$  is defined as before and  $(e_i)_{1 \leq i \leq n}$  in the standard basis in  $\mathbb{R}^n$ . Since  $p_i \geq \beta \cdot l_i(\lambda\epsilon)/d_{\text{eff}}$  with  $d_{\text{eff}} = \sum_{i=1}^n l_i(\lambda\epsilon)$  we have

$$\|X_k\|_{\text{op}} \leq \frac{1}{p} \max_i \left(\frac{d_{\text{eff}}}{\beta l_i(\lambda\epsilon)} - 1\right) = \frac{1}{p} \left(\frac{d_{\text{eff}}}{\beta \underline{l}} - 1\right) \leq \frac{d_{\text{eff}}}{p \beta \underline{l}},$$

with  $\underline{l} = \min_i l_i(\lambda\epsilon)$ . On the other hand,

$$\mathbb{E}(X_k^2) = \frac{1}{p^2} \sum_{i=1}^n \mathbb{E} \left( \left(\frac{z_{ik}}{p_i} - 1\right)^2 \right) e_i e_i^\top = \frac{1}{p^2} \sum_{i=1}^n \left(\frac{1}{p_i} - 1\right) e_i e_i^\top \preceq \frac{1}{p^2} \frac{d_{\text{eff}}}{\beta \underline{l}} I.$$

Hence

$$\|\mathbb{E}(Y^2)\|_{\text{op}} \leq \frac{1}{p} \frac{d_{\text{eff}}}{\beta \underline{l}}.$$

By choosing  $\sigma^2 = R = \frac{1}{p} \frac{d_{\text{eff}}}{\beta \underline{l}}$ , we have  $\|SS^\top - I\|_{\text{op}} \leq t$  with probability at least  $1 - 2n \exp\left(-\frac{t^2/2}{R(1+t/3)}\right)$ . Taking  $t = \max\left\{1, \frac{8d_{\text{eff}}}{3\beta \underline{l} \cdot p} \log\left(\frac{2n}{\rho}\right)\right\}$ , the latter probability is greater than  $1 - \rho$ , and by the triangle inequality:  $\|S\|_{\text{op}}^2 \leq 1 + t$  with the same probability. By taking  $p \geq 8(d_{\text{eff}}/\beta + 1/6) \log\left(\frac{n}{\rho}\right)$  (thereby verifying the condition from the previous paragraph) we have

$$\frac{8d_{\text{eff}}}{3\beta \underline{l} \cdot p} \log\left(\frac{2n}{\rho}\right) \leq \frac{1}{3\underline{l}} \cdot \frac{d_{\text{eff}}}{(d_{\text{eff}} + \beta/6)} \cdot \frac{\log\left(\frac{2n}{\rho}\right)}{\log\left(\frac{n}{\rho}\right)} \leq \frac{1}{3\underline{l}} \cdot \left(1 + \frac{\log 2}{\log\left(\frac{n}{\rho}\right)}\right) \leq \frac{1}{\underline{l}}$$

if  $n \geq 2$ , and therefore  $\|S\|_{\text{op}}^2 \leq 1 + 1/\underline{l}$  (since  $\underline{l} \leq 1$ ) with probability at least  $1 - \rho$ .

## D Proof of theorem 4

First, it is clear that

$$\begin{aligned} \tilde{l}_i &= e_i^\top B(B^\top B + n\lambda I)^{-1} B^\top e_i \\ &= e_i^\top B B^\top (B B^\top + n\lambda I)^{-1} e_i \\ &= \text{diag}(L(L + n\lambda I)^{-1})_i \end{aligned}$$

with  $e_i$  the  $i$ -th element of the standard basis in  $\mathbb{R}^n$ . Now we bound the approximations  $\tilde{l}_i$  by comparing the matrices  $L(L + n\lambda I)^{-1}$  and  $K(K + n\lambda I)^{-1}$  with respect to the semidefinite order. Since  $L \preceq K$  (Appendix A) and the map  $K \rightarrow K(K + n\lambda I)^{-1}$  is matrix-increasing, we immediately get the upper bound  $\tilde{l}_i \leq l_i(\lambda)$  for all  $i \in \{1, \dots, n\}$ . Next we derive the lower bound. For  $\gamma > 0$ , we consider again the regularized approximation  $L_\gamma = KS(S^\top KS + n\gamma I)^{-1} S^\top K$  with  $S \in \mathbb{R}^{n \times p}$  the sketching matrix. Due the matrix inversion lemma,  $L_\gamma \preceq L$  (Appendix A). Hence to get a lower bound on  $\tilde{l}_i$ , it suffices to obtain a lower bound for the same quantity when  $L$  is replaced by  $L_\gamma$ . We proved in Appendix A that if

$$\lambda_{\max}(\Psi\Psi^\top - \Psi S S^\top \Psi^\top) \leq t$$

for  $t \geq 0$  with  $\Psi = \Phi^{1/2} U^\top$ ,  $\Phi = \Sigma(\Sigma + n\gamma I)^{-1}$  then

$$K - L_\gamma \preceq \frac{n\gamma}{1-t} K(K + n\gamma I)^{-1} \preceq \frac{n\gamma}{1-t} I.$$

Therefore

$$\begin{aligned} L_\gamma(L_\gamma + n\lambda I)^{-1} &\succeq (K - \frac{n\gamma}{1-t} I)(K + n\lambda I)^{-1} \\ &\succeq K(K + n\lambda I)^{-1} - \frac{\gamma/\lambda}{1-t} I, \end{aligned}$$

where the last line follows by distributing the product and using the inequality  $K + n\lambda I \succeq n\lambda I$  for the second term. Hence  $\tilde{l}_i \geq l_i(\lambda) - \frac{\gamma/\lambda}{1-t}$ . Now we choose again  $t = 1/2$  and  $\gamma = \epsilon\lambda$  for  $\epsilon \in (0, 1/2)$ , we get the additive error bound on  $\tilde{l}_i$  and similarly to the proof of Theorem 3, it suffices to have  $p \geq 8(d_{\text{eff}}/\beta + 1/6) \log\left(\frac{n}{\rho}\right)$ . To finish the proof, we choose the sampling distribution  $(p_i)_i$  and  $\beta$  appropriately. Since

$$l_i(\gamma) = \sum_{j=1}^n \frac{\sigma_j}{\sigma_j + n\gamma} U_{ij}^2 \leq \sum_{j=1}^n \frac{\sigma_j}{n\gamma} U_{ij}^2 = \frac{1}{n\gamma} K_{ii},$$

by choosing  $p_i = K_{ii}/\text{Tr}(K)$ , we have  $p_i \geq \beta l_i(\lambda\epsilon)/\sum_{i=1}^n l_i(\lambda\epsilon)$  with  $\beta = n\lambda\epsilon d_{\text{eff}}/\text{Tr}(K)$ , which yields  $d_{\text{eff}}/\beta = \text{Tr}(K)/(n\lambda\epsilon)$ .

As for the multiplicative error bound, using  $K - L_\gamma \preceq \frac{n\gamma}{1-t} K(K + n\gamma I)^{-1}$  we get

$$\begin{aligned} L_\gamma(L_\gamma + n\lambda I)^{-1} &\succeq (K - \frac{n\gamma}{1-t} K(K + n\gamma I)^{-1})(K + n\lambda I)^{-1} \\ &= K(K + n\lambda I)^{-1} (I - \frac{n\gamma}{1-t} (K + n\gamma I)^{-1}). \end{aligned}$$

For  $t = 1/2$ ,  $I - \frac{n\gamma}{1-t} (K + n\gamma I)^{-1} = (K - n\gamma I)(K + n\gamma I)^{-1} \succeq \frac{\sigma_n - n\gamma}{\sigma_n + n\gamma} I$ . The result follows.

## References

- [1] Francis Bach. Sharp analysis of low-rank kernel matrix approximations. In *Proceedings of The 26th Conference on Learning Theory*, pages 185–209, 2013.
- [2] Francis Bach. Personal communication, October 2015.
- [3] Joel A Tropp. User-friendly tail bounds for sums of random matrices. *Foundations of Computational Mathematics*, 12(4):389–434, 2012.
- [4] Rajendra Bhatia. *Matrix analysis*, volume 169. Springer Science & Business Media, 2013.
